# Supplementary material for: Menstrual cycle associated changes in hormone-related gene expression in oestrogen receptor positive breast cancer
Source: PubMed Central journal article supplement (PMC6858333; doi:10.1038/s41523-019-0138-2), 2019-11-15
Supplement: 41523_2019_138_MOESM2_ESM.pdf [file 41523_2019_138_MOESM2_ESM.pdf]

## **Supplementary Information**

# **Menstrual cycle associated changes in hormone related gene expression in oestrogen receptor positive breast cancer**

Ben P Haynes\* et al

\*corresponding author; Ben P. Haynes, The Ralph Lauren Centre for Breast Cancer Research, Royal Marsden Hospital, Fulham Road, London SW3 6JJ, UK. Tel. +44 20 7808 2969; Fax +44 20 3763918; E-mail: [ben.haynes@icr.ac.uk](mailto:ben.haynes@icr.ac.uk)

**Supplementary Data 1:** Nanostring raw gene expression data and window of cycle for all samples (n=130; 65 pairs)

**Supplementary Data 2:** Changes in gene expression between the same window and individual windows of the menstrual cycle

**Supplementary Data 3:** Housekeeper normalized log-transformed gene expression data for all samples (n=130; 65 pairs)

**Supplementary Table 1: Patient demographics in the two independent prospective studies used**

|                           | Vietnamese study<br>(n=20) | MenCER (n=45) |
|---------------------------|----------------------------|---------------|
| <b>Age in years</b>       |                            |               |
| Median (range)            | 40 (31-49)                 | 46 (34-49)    |
| <35                       | 6 (30.0%)                  | 2 (4.4%)      |
| 35-39                     | 4 (20.0%)                  | 1 (2.2%)      |
| 40-44                     | 7 (35.0%)                  | 14 (31.1%)    |
| >=45                      | 3 (15.0%)                  | 28 (62.2%)    |
|                           |                            |               |
| <b>Lymph node status;</b> |                            |               |
| 0 positive nodes          | 8 (40.0%)                  | 38 (84.4%)    |
| 1-3 positive nodes        | 9 (45.0%)                  | 6 (13.3%)     |
| > 3 positive nodes        | 3 (15.0%)                  | 1 (2.2%)      |
| Not known                 | -                          |               |
|                           |                            |               |
| <b>Tumour grade;</b>      |                            |               |
| 1                         | 5 (25.0%)                  | 15 (33.3%)    |
| 2                         | 13 (65.0%)                 | 23 (51.1%)    |
| 3                         | 1 (5.0%)                   | 7 (15.5%)     |
| Not known                 | 1 (5.0%)                   | -             |
|                           |                            |               |
| <b>Tumour size;</b>       |                            |               |
| Median (range)            | 2.0 (0.5-3.5)              | 2.4 (0.8-7.5) |
|                           |                            |               |
| <b>Tumour type</b>        |                            |               |
| Invasive ductal           | 17 (85.0%)                 | 40 (88.9%)    |
| Lobular                   | 1 (5.0%)                   | 4 (8.9%)      |
| Mixed                     | 1 (5.0%)                   | 1 (2.2%)      |
| Not known                 | 1 (5.0%)                   | 0             |
|                           |                            |               |
| <b>PR status</b>          |                            |               |
| -ve                       | 4 (20%)                    | 4 (9%)        |
| +ve                       | 16 (80.0%)                 | 41 (91%)      |
|                           |                            |               |
| <b>HER2</b>               |                            |               |
| -ve                       | 15 (75.0%)                 | 44 (97.5%)    |
| +ve                       | 5 (25.0%)                  | 1 (2.2%)      |

**Supplementary Table 2: Changes in gene expression between Window 1 vs. Window 2 or 3**

| Gene            | Gene expression in W2 or W3 relative to W1 (=1.00) | Wilcoxon p-value | FDR   |
|-----------------|----------------------------------------------------|------------------|-------|
| GREB1           | 1.80                                               | 0.0004           | 0.016 |
| IGSF1           | 2.36                                               | 0.0009           | 0.018 |
| MSMB            | 2.34                                               | 0.0048           | 0.035 |
| PGR             | 1.96                                               | 0.0069           | 0.035 |
| SERPINA3        | 1.51                                               | 0.0067           | 0.035 |
| TFF1            | 2.21                                               | 0.0053           | 0.035 |
| ATP6V1B1        | 1.41                                               | 0.0041           | 0.035 |
| CELSR2          | 1.44                                               | 0.0049           | 0.035 |
| UBE2C           | 1.33                                               | 0.0081           | 0.036 |
| TOP2A           | 1.47                                               | 0.013            | 0.050 |
| CDC20           | 1.28                                               | 0.014            | 0.052 |
| PDZK1           | 1.75                                               | 0.020            | 0.063 |
| TFF3            | 1.56                                               | 0.019            | 0.063 |
| HMMR            | 1.38                                               | 0.023            | 0.066 |
| SERPINA5        | 1.51                                               | 0.031            | 0.080 |
| TNFSF10         | 0.86                                               | 0.032            | 0.080 |
| RANKL (TNFSF11) | 1.69                                               | 0.058            | 0.11  |
| SGK3            | 1.19                                               | 0.047            | 0.11  |
| MKI67           | 1.35                                               | 0.051            | 0.11  |
| UBE2T           | 1.23                                               | 0.053            | 0.11  |
| CLIC6           | 1.44                                               | 0.056            | 0.11  |
| PDZK1P1         | 1.38                                               | 0.078            | 0.14  |
| DCN             | 0.78                                               | 0.084            | 0.15  |
| ERBB2           | 0.94                                               | 0.13             | 0.22  |
| IRS1            | 1.11                                               | 0.18             | 0.27  |
| AGR2            | 1.15                                               | 0.18             | 0.27  |
| ACOX2           | 0.80                                               | 0.18             | 0.27  |
| SHROOM3         | 1.21                                               | 0.20             | 0.29  |
| STC2            | 1.24                                               | 0.21             | 0.29  |
| RUNX1           | 1.10                                               | 0.30             | 0.40  |
| AURKA           | 1.06                                               | 0.43             | 0.55  |
| FKBP5           | 1.11                                               | 0.45             | 0.56  |
| RASSF5          | 0.96                                               | 0.53             | 0.64  |
| SLC2A3          | 1.16                                               | 0.57             | 0.67  |
| EFHD1           | 1.03                                               | 0.63             | 0.72  |
| NDP             | 1.09                                               | 0.71             | 0.79  |
| MYB             | 1.07                                               | 0.78             | 0.84  |
| ESR1            | 1.03                                               | 0.85             | 0.89  |
| CTGF            | 0.97                                               | 0.99             | 0.99  |
| TGFB3           | 0.99                                               | 0.99             | 0.99  |
| AvERG           | 1.92                                               | 0.0005           |       |
| AvProlif        | 1.29                                               | 0.013            |       |
| AvProg          | 1.37                                               | 0.089            |       |

**Supplementary Table 3: Changes in gene expression between Window 3 vs. Window 1 or 2**

| Gene            | Gene expression in W3 relative to W1 or W2 (=1.00) | Wilcoxon p-value | FDR  |
|-----------------|----------------------------------------------------|------------------|------|
| FKBP5           | 1.49                                               | 0.0057           | 0.23 |
| ATP6V1B1        | 0.68                                               | 0.016            | 0.32 |
| SERPINA3        | 1.32                                               | 0.033            | 0.44 |
| PDZK1           | 0.69                                               | 0.053            | 0.53 |
| RANKL (TNFSF11) | 1.44                                               | 0.10             | 0.65 |
| RUNX1           | 1.03                                               | 0.12             | 0.65 |
| EFHD1           | 1.09                                               | 0.12             | 0.65 |
| MYB             | 0.87                                               | 0.13             | 0.65 |
| TFF1            | 0.79                                               | 0.19             | 0.73 |
| ACOX2           | 0.85                                               | 0.19             | 0.73 |
| UBE2T           | 1.10                                               | 0.20             | 0.73 |
| IGSF1           | 0.68                                               | 0.22             | 0.73 |
| PDZK1P1         | 1.18                                               | 0.27             | 0.83 |
| TGFB3           | 1.08                                               | 0.30             | 0.83 |
| NDP             | 0.86                                               | 0.31             | 0.83 |
| PGR             | 0.99                                               | 0.33             | 0.83 |
| TFF3            | 0.89                                               | 0.39             | 0.86 |
| CELSR2          | 0.94                                               | 0.41             | 0.86 |
| MSMB            | 1.36                                               | 0.43             | 0.86 |
| DCN             | 0.90                                               | 0.45             | 0.86 |
| ERBB2           | 1.02                                               | 0.45             | 0.86 |
| RASSF5          | 1.14                                               | 0.52             | 0.88 |
| AURKA           | 0.95                                               | 0.52             | 0.88 |
| TNFSF10         | 0.98                                               | 0.53             | 0.88 |
| CTGF            | 1.12                                               | 0.59             | 0.94 |
| SERPINA5        | 0.96                                               | 0.70             | 0.98 |
| TOP2A           | 1.08                                               | 0.70             | 0.98 |
| GREB1           | 0.97                                               | 0.72             | 0.98 |
| CLIC6           | 0.95                                               | 0.74             | 0.98 |
| STC2            | 0.92                                               | 0.74             | 0.98 |
| AGR2            | 1.02                                               | 0.76             | 0.98 |
| IRS1            | 0.97                                               | 0.78             | 0.98 |
| SLC2A3          | 1.09                                               | 0.82             | 0.99 |
| UBE2C           | 1.02                                               | 0.86             | 0.99 |
| ESR1            | 1.00                                               | 0.89             | 0.99 |
| CDC20           | 1.00                                               | 0.92             | 0.99 |
| SGK3            | 1.01                                               | 0.93             | 0.99 |
| SHROOM3         | 0.95                                               | 0.95             | 0.99 |
| HMMR            | 1.06                                               | 0.98             | 0.99 |
| MKI67           | 1.01                                               | 0.99             | 0.99 |

|          |      |       |
|----------|------|-------|
| AvERG    | 0.85 | 0.13  |
| AvProlif | 1.01 | 0.98  |
| AvProg   | 1.46 | 0.026 |

**Supplementary Table 4: Changes in gene expression of housekeeping genes between different windows of the menstrual cycle**

| Gene                          | Gene expression relative to first window (=1.00) | Wilcoxon p-value | FDR   |
|-------------------------------|--------------------------------------------------|------------------|-------|
| <b>W1 vs. W2 (n=14)</b>       |                                                  |                  |       |
| ACTB                          | 0.97                                             | 0.50             | 0.61  |
| MRPL19                        | 0.96                                             | 0.25             | 0.42  |
| PSMC4                         | 0.92                                             | 0.01             | 0.11  |
| SF3A1                         | 1.01                                             | 0.50             | 0.61  |
| TBP                           | 1.14                                             | 0.02             | 0.11  |
| <b>W1 vs. W3 (n=10)</b>       |                                                  |                  |       |
| ACTB                          | 1.01                                             | 0.004            | 0.160 |
| MRPL19                        | 1.01                                             | 0.85             | 0.890 |
| PSMC4                         | 1.00                                             | 0.32             | 0.540 |
| SF3A1                         | 0.96                                             | 0.19             | 0.400 |
| TBP                           | 1.01                                             | 0.02             | 0.160 |
| <b>W2 vs. W3 (n=20)</b>       |                                                  |                  |       |
| ACTB                          | 1.01                                             | 0.76             | 0.91  |
| MRPL19                        | 1.01                                             | 0.55             | 0.90  |
| PSMC4                         | 1.00                                             | 0.87             | 0.93  |
| SF3A1                         | 0.96                                             | 0.21             | 0.72  |
| TBP                           | 1.01                                             | 0.57             | 0.90  |
| <b>W1 vs W2 or W3 (n=28)</b>  |                                                  |                  |       |
| ACTB                          | 1.07                                             | 0.06             | 0.13  |
| MRPL19                        | 1.01                                             | 0.91             | 0.95  |
| PSMC4                         | 0.98                                             | 0.52             | 0.66  |
| SF3A1                         | 0.97                                             | 0.35             | 0.49  |
| TBP                           | 0.96                                             | 0.65             | 0.75  |
| <b>W1 or W2 vs. W3 (n=32)</b> |                                                  |                  |       |
| ACTB                          | 1.06                                             | 0.08             | 0.65  |
| MRPL19                        | 1.02                                             | 0.52             | 0.82  |
| PSMC4                         | 1.01                                             | 0.53             | 0.82  |
| SF3A1                         | 0.97                                             | 0.53             | 0.82  |
| TBP                           | 0.94                                             | 0.22             | 0.71  |
| <b>Same window (n=15)</b>     |                                                  |                  |       |
| ACTB                          | 1.13                                             | 0.11             | 0.28  |
| MRPL19                        | 1.04                                             | 0.18             | 0.38  |
| PSMC4                         | 0.93                                             | 0.04             | 0.18  |
| SF3A1                         | 1.05                                             | 0.06             | 0.20  |
| TBP                           | 0.94                                             | 0.19             | 0.39  |

Supplementary Figure 1

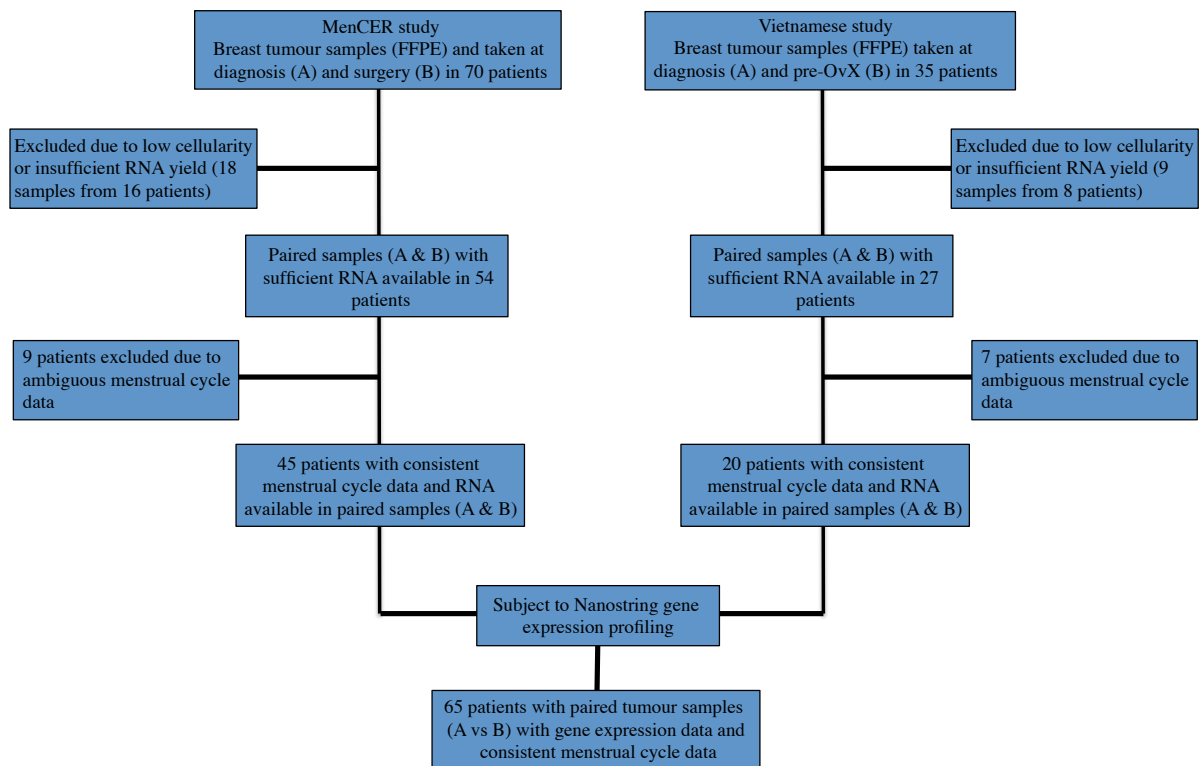

**Supplementary Figure 1;** Consort diagram showing the derivation of samples for gene expression studies.

## Supplementary Figure 2

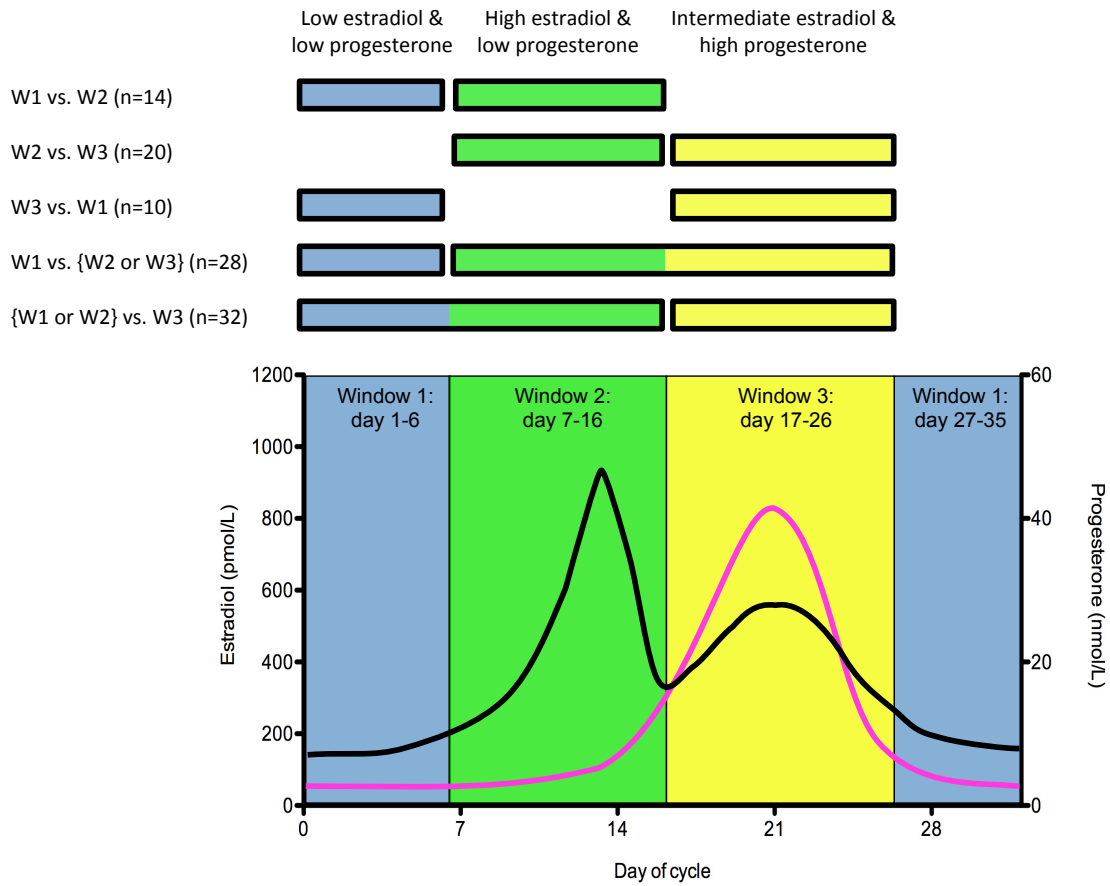

**Supplementary Figure 2:** Pre-defined menstrual cycle windows and number of window comparisons available.

### Supplementary Figure 3

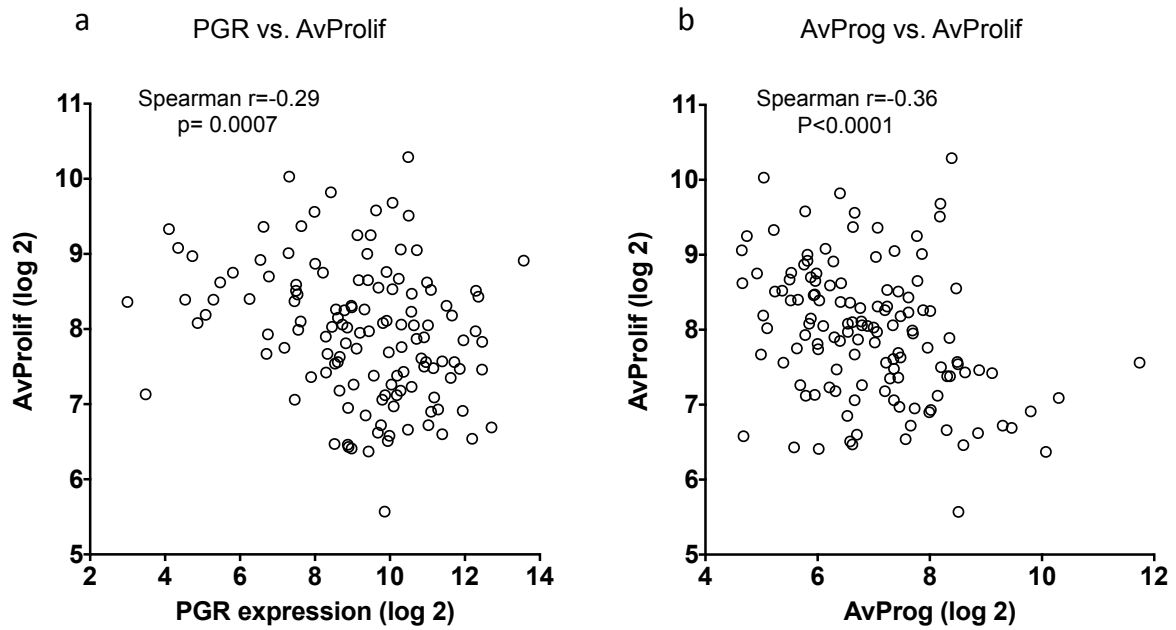

**Supplementary Figure 3:** Relationship between proliferation (AvProlif) and progesterone receptor expression (a; PGR) and progesterone receptor signaling (b; AvProg) and in all samples (n=130).



## Supplementary Figure 4

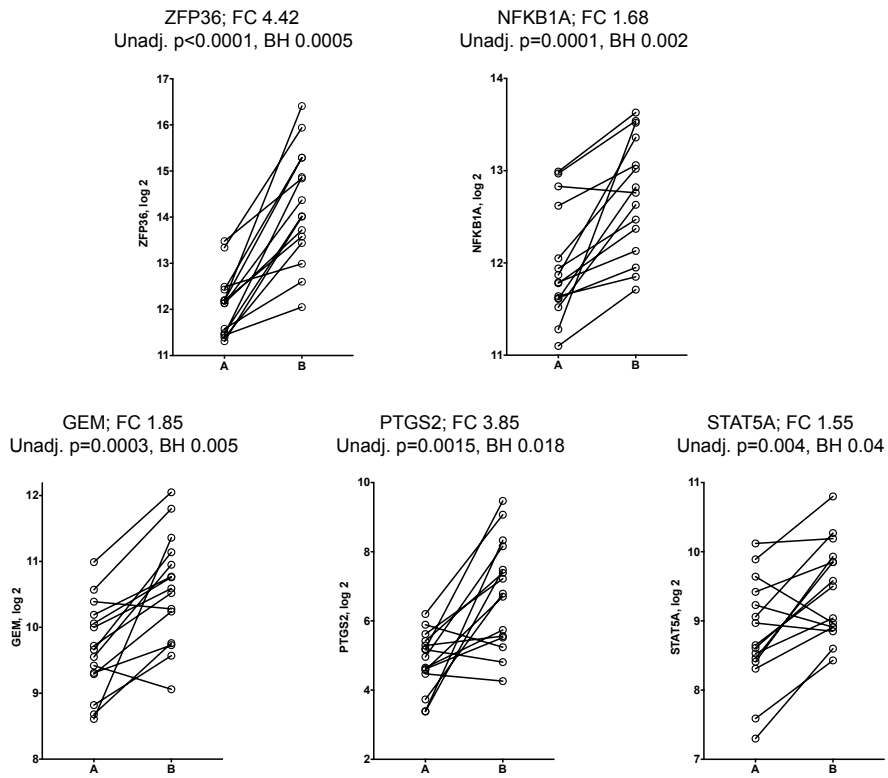

**Supplementary Figure 4:** Genes showing significant changes in comparisons made between samples taken in the same window.

## Supplementary Figure 5

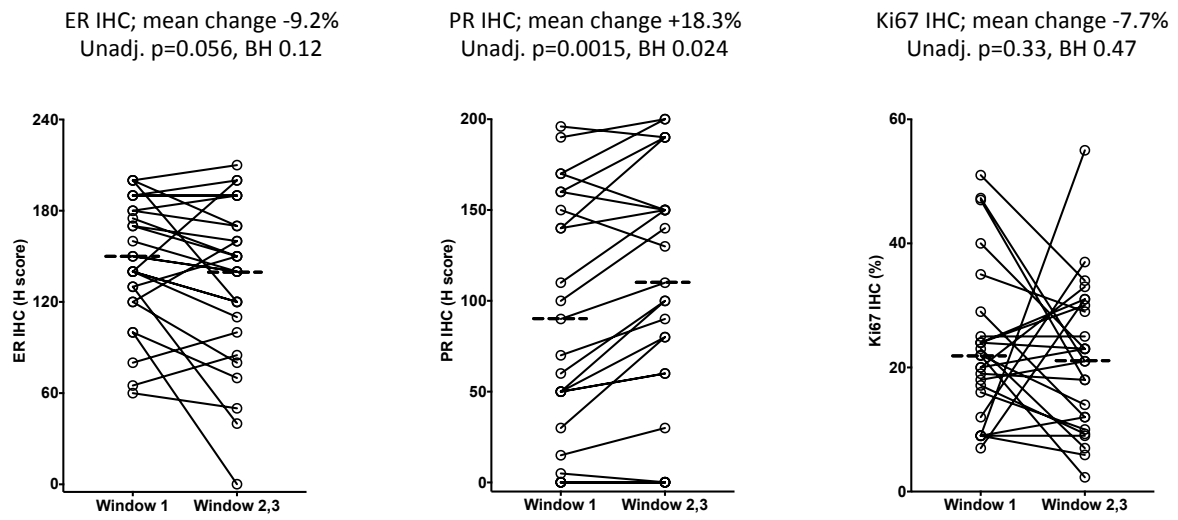

**Supplementary Figure 5:** Changes in protein levels of ER, PgR and Ki67 between Window 1 vs. Windows 2 or 3 (n=28). Dotted lines indicate median level of window.

## Supplementary Figure 6

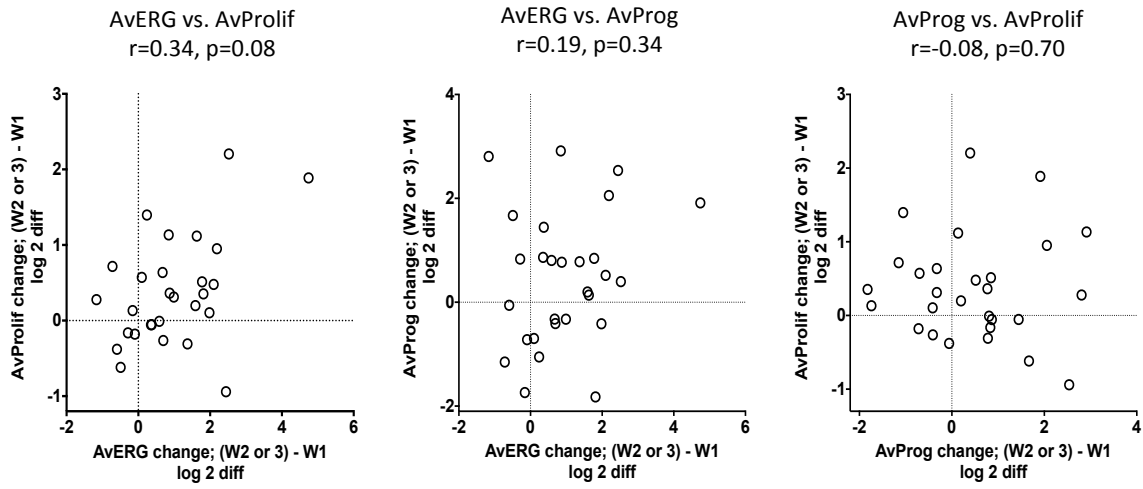

**Supplementary Figure 6:** Correlation of changes in AvERG, AvProlif and AvProg between Window 1 vs. Window 2 or 3 (n=28).

## Supplementary Figure 7

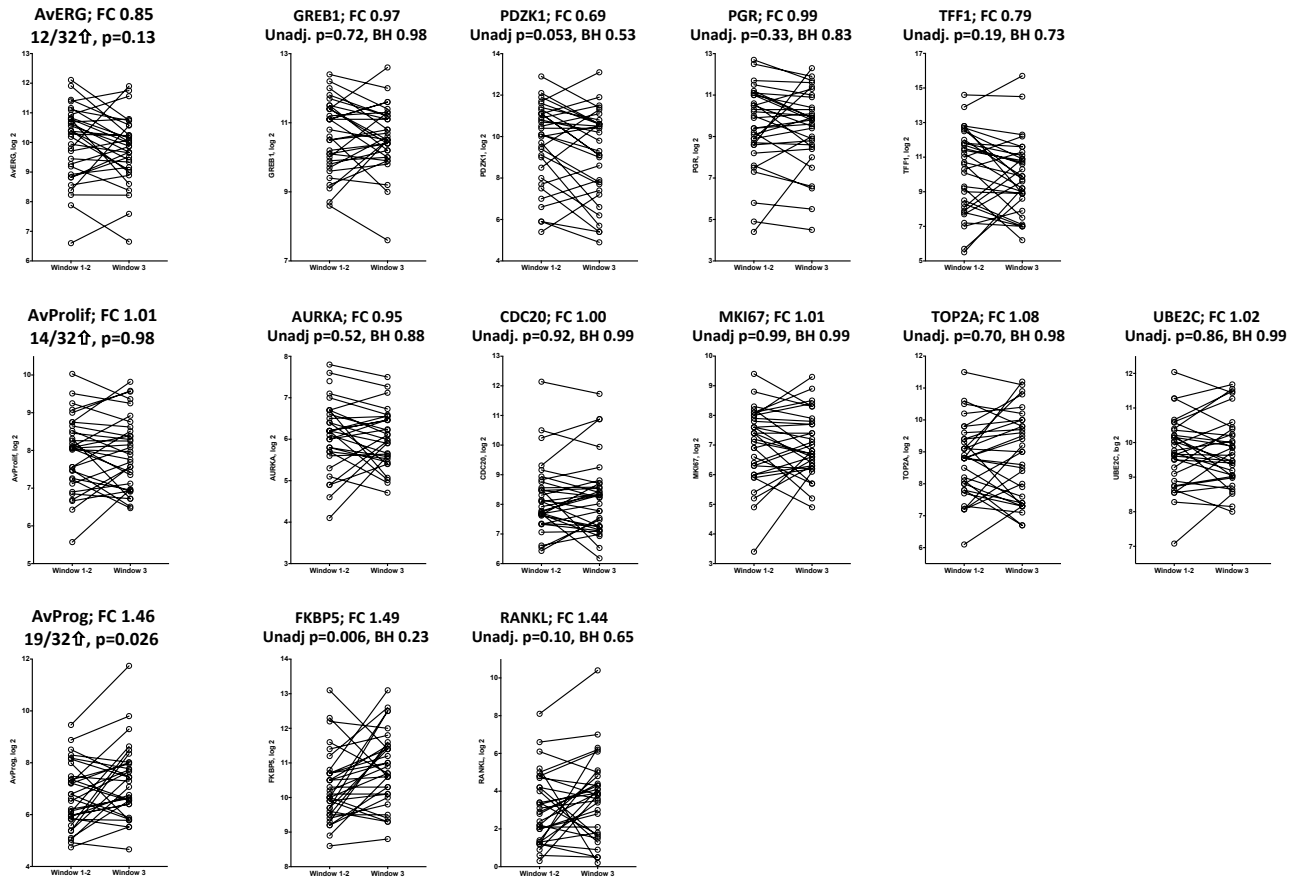

**Supplementary Figure 7:** Changes in AvERG, AvProlif and AvProg and in expression of their individual component ERGs, PAGs and PRGs between Window 3 vs. Window 1 or 2 (n=32)

## Supplementary Figure 8

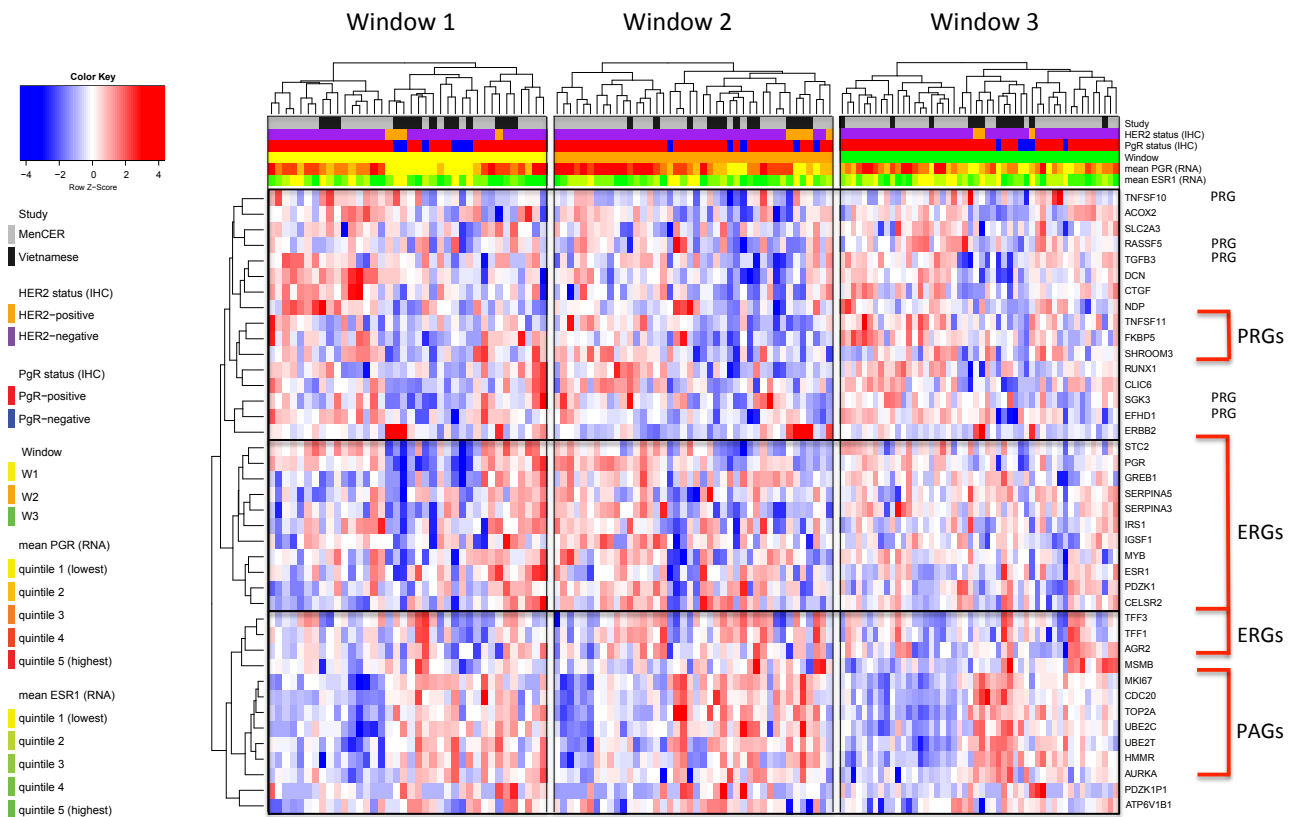

**Supplementary Figure 8:** Hierarchical clustering of the gene expression data from the combined sample set of 130 samples (65 pairs) according to the window of the menstrual cycle the sample was taken in (values z-scored across all three windows)
